# Supplementary material for: Role of functional groups on protonated de-oiled soybean involved in triclosan biosorption from aqueous solution
Source: Royal Society of Chemistry journal article supplement (doi:10.1039/c6ra06702f), 2016-01-01
Supplement: c6ra06702f1.pdf [file c6ra06702f1.pdf]

## Supplementary Information

### Role of functional groups on protonated de-oiled soybean involved in triclosan biosorption from aqueous solution

Jing-Feng Gao\*, Chun-Ying Si, Hong-Yu Li

Correspondence and phone calls about the paper should be directed to Jing-Feng Gao at the following address, telephone and fax number, and e-mail address:

#### Jing-Feng Gao

College of Environmental and Energy Engineering, Beijing University of Technology, 100 Pingleyuan, Chaoyang District, Beijing 100124, China

Tel: +86-10-6739-1918(office); Fax: +86-10-6739-1983

E-mail: [gao.jingfeng@bjut.edu.cn](mailto:gao.jingfeng@bjut.edu.cn) or [gao158@gmail.com](mailto:gao158@gmail.com)

**Figure S1** Effect of time, initial TCS concentration on TCS biosorption by PDOS (initial pH=4.0, biosorbent dosage=2.0 g L<sup>-1</sup>, temperature=20 °C).

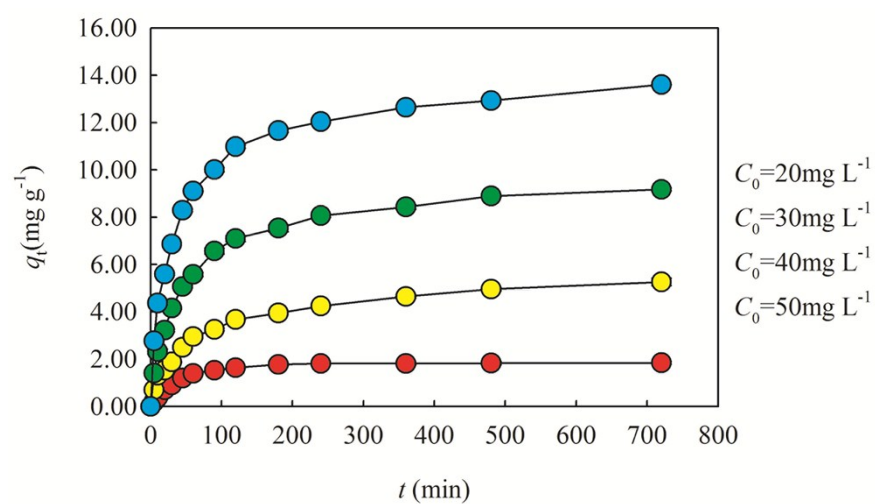

**Fig. S1** Effect of time, initial TCS concentration on TCS biosorption by PDOS (initial pH=4.0, biosorbent dosage=2.0 g L<sup>-1</sup>, temperature=20 °C).
